# Supplementary material for: Regulation of formation of volatile compounds of tea (Camellia sinensis) leaves by single light wavelength
Source: PubMed Central journal article supplement (PMC4645219; doi:10.1038/srep16858), 2015-11-16
Supplement: srep16858-s1.pdf [file srep16858-s1.pdf]

**Title:** Regulation of formation of volatile compounds of tea (*Camellia sinensis*) leaves by single light wavelength

**Authors:** Xiumin Fu<sup>1,2,+</sup>, Yiyong Chen<sup>1,3,+</sup>, Xin Mei<sup>1,2</sup>, Tsuyoshi Katsuno<sup>4</sup>, Eiji Kobayashi<sup>4</sup>, Fang Dong<sup>5</sup>, Naoharu Watanabe<sup>6</sup>, and Ziyin Yang<sup>1,2,3,\*</sup>

***Affiliations:***

<sup>1</sup> *Key Laboratory of South China Agricultural Plant Molecular Analysis and Genetic Improvement, South China Botanical Garden, Chinese Academy of Sciences, Xingke Road 723, Tianhe District, Guangzhou 510650, China*

<sup>2</sup> *Guangdong Provincial Key Laboratory of Applied Botany, South China Botanical Garden, Chinese Academy of Sciences, Xingke Road 723, Tianhe District, Guangzhou 510650, China*

<sup>3</sup> *University of Chinese Academy of Sciences, No.19A Yuquan Road, Beijing 100049, China*

<sup>4</sup> *Tea Research Center, Shizuoka Prefectural Research Institute of Agriculture and Forestry 1706-11 Kurasawa, Kikugawa 439-0002, Japan*

<sup>5</sup> *Guangdong Food and Drug Vocational College, Longdongbei Road 321, Tianhe District, Guangzhou 510520, China*

<sup>6</sup> *Graduate School of Science and Technology, Shizuoka University, 3-5-1 Johoku, Naka-ku, Hamamatsu 432-8561, Japan*

\* Corresponding author. Ziyin Yang, Tel: +86-20-38072989, *Email address:* [zyyang@scbg.ac.cn](mailto:zyyang@scbg.ac.cn).

+ These authors contributed equally to this work.

## Supplementary Information

**Table S1** Primers of qRT-PCR used in this study

| Gene           | Accession number | Forward primer 5'-3'        | Reverse primer 5'-3'     |
|----------------|------------------|-----------------------------|--------------------------|
| <i>LOX1</i>    | EU195885         | GCTGACTGGACAACCGATGA        | CAACATATGCTTCTATGAAAATGC |
| <i>LOX2</i>    | FJ418174         | GTTTTGTCAAATCATTCGGT        | TCCTTCAAACCTCAAGTTTG     |
| <i>LOX3</i>    | FJ794853         | GGGACAACACTGTATGGG          | CCAGAGTCATGAGCAAGGG      |
| <i>LOX4</i>    | HM370508         | TTCTTGGCATTTCCCTCGTA        | TCATCCTCGTTCATCCTTGT     |
| <i>PAL</i>     | D26596           | ATTCCTTGCCAATCCTGTAA        | ACTGCCTCGGCTGTCTTTCT     |
| <i>PAAS</i>    | FS952786         | GGGAACCTTCAATCTTAC          | ACATGCCTTTCTTCTGTC       |
| <i>PAR1</i>    | KR873393         | TGGTTATTGGTCCTCTGTT         | ATATCTTCCATTGGCTGAA      |
| <i>PAR2</i>    | KR873394         | ACTGGTTATCGGTCCTCTC         | GCATTGGCAACATCTTTA       |
| <i>TPS1</i>    | KF006849         | TGAAGTTCGCTAGAGACCAACCTCTAA | TCCACAGCACCAAGTTCCCATCTA |
| <i>TPS2</i>    | KR873395         | ATCTTAAAATGGACGGGCT         | TGAGGACATCTTCGAACAAG     |
| <i>TPS3</i>    | KR873396         | CAGCACAAACGAAATTTCTT        | CATTCCATGACCCAAGAGAA     |
| <i>β-actin</i> | HQ420251.1       | GCCATATTTGATTGGAATGG        | GGTGCCACAACCTTGATCTT     |

*LOX*, 9/13-lipoxygenase; *PAL*, phenylalanine ammonialyase; *PAAS*, phenylacetaldehyde synthase; *PAR*, phenylacetaldehyde reductases; *TPS*, terpene synthase.

**Table S2** Primers used to clone the ORF of genes

| Gene        | Forward primer                       | Reverse primer                      |
|-------------|--------------------------------------|-------------------------------------|
| <i>PAL</i>  | ACGCGTCGACAAATGGATAGTACC<br>ACCGCC   | TTAGCGGCCGCCTAACAGATAGGAAG<br>AGG   |
| <i>TPS1</i> | ACGCGTCGACAAATGCAAATCTTCCACT<br>GTGC | TTAGCGGCCGCCTAAGGTAATTTATC<br>ATAG  |
| <i>TPS3</i> | ACGCGTCGACAAATGGCTGCCACC<br>ACCACC   | TTAGCGGCCGCTTAGAGAGAAACAGTATC<br>AC |

**Table S3** Comparison of volatiles in 0 min and 120 min or 240 min treatments of dark, UVA, blue light, red light, and near-infrared (NIR) on postharvest tea leaves

|                                                  | 0 min          | Dark          | UVA            | Blue           | Red            | NIR             |
|--------------------------------------------------|----------------|---------------|----------------|----------------|----------------|-----------------|
|                                                  |                |               | <b>120 min</b> |                |                |                 |
| Benzyl alcohol <sup>a</sup>                      | 142.87 ±2.97ab | 113.40 ±7.60c | 135.80 ±6.96b  | 143.26 ±4.93ab | 154.37 ±7.02a  | 156.82 ±2.92a   |
| Terpineol, alpha- <sup>b</sup>                   | 0.10 ±0.02a    | 0.04 ±0.00c   | 0.05 ±0.01bc   | 0.07 ±0.01bc   | 0.08 ±0.00b    | 0.06 ±0.00bc    |
| Benzaldehyde <sup>a</sup>                        | 10.69 ±2.05a   | 5.83 ±0.41b   | 7.27 ±0.97b    | 7.80 ±0.50b    | 7.57 ±0.99b    | 8.30 ±0.72b     |
| 3-Hexen-1-ol acetate <sup>a</sup>                | 20.50 ±1.08a   | 1.98 ±0.27c   | 2.06 ±1.08c    | 4.50 ±0.50bc   | 5.32 ±1.13b    | 3.02 ±1.67bc    |
| Phenylethyl alcohol <sup>a</sup>                 | 19.55 ±0.83ab  | 15.37 ±0.79c  | 19.27 ±1.67b   | 20.47 ±1.29ab  | 20.73 ±0.80ab  | 22.47 ±1.12a    |
| Geraniol <sup>a</sup>                            | 130.59 ±3.55a  | 104.46 ±6.05c | 110.23 ±3.59bc | 124.28 ±8.54ab | 137.82 ±11.91a | 121.55 ±6.33abc |
| Nerol <sup>b</sup>                               | 0.05 ±0.00ab   | 0.04 ±0.01b   | 0.05 ±0.00ab   | 0.05 ±0.01ab   | 0.06 ±0.00a    | 0.06 ±0.00a     |
| Nonanal <sup>b</sup>                             | 0.08 ±0.01a    | 0.06 ±0.01c   | 0.06 ±0.01bc   | 0.08 ±0.01abc  | 0.08 ±0.00ab   | 0.07 ±0.01abc   |
| 1-Nonanol <sup>b</sup>                           | 0.05 ±0.01bcd  | 0.04 ±0.00d   | 0.05 ±0.00cd   | 0.06 ±0.00ab   | 0.07 ±0.00a    | 0.07 ±0.01cd    |
| 3-Hexen-1-ol <sup>a</sup>                        | 98.30 ±2.30bc  | 67.13 ±5.01e  | 79.37 ±6.15de  | 108.39 ±5.61ab | 117.50 ±4.84a  | 89.70 ±9.62cd   |
| Methyl salicylate <sup>a</sup>                   | 52.71 ±6.48bc  | 45.26 ±3.70c  | 53.61 ±1.25bc  | 60.90 ±2.42ab  | 62.53 ±3.25a   | 55.79 ±0.45ab   |
| Linalool <sup>a</sup>                            | 76.16 ±2.75a   | 75.26 ±6.22a  | 75.23 ±2.06a   | 84.97 ±6.65a   | 82.78 ±2.58a   | 73.71 ±3.18a    |
| Linalool oxide <sup>a</sup>                      | 75.42 ±2.01a   | 75.06 ±7.40a  | 77.55 ±0.97a   | 85.95 ±7.09a   | 83.22 ±2.96a   | 75.90 ±5.95a    |
| 2,6-dimethyl-2,7-octadiene-1,6-diol <sup>b</sup> | 0.11 ±0.01a    | 0.10 ±0.01a   | 0.12 ±0.01a    | 0.12 ±0.02a    | 0.10 ±0.01a    | 0.11 ±0.01a     |
| Linalool pyran oxide <sup>b</sup>                | 0.41 ±0.02bc   | 0.39 ±0.02c   | 0.41 ±0.01abc  | 0.48 ±0.04ab   | 0.46 ±0.02a    | 0.45 ±0.02a     |
| 2-Hexenal <sup>b</sup>                           | 0.50 ±0.03bc   | 0.40 ±0.03c   | 0.58 ±0.02b    | 0.79 ±0.10a    | 0.75 ±0.04a    | 0.45 ±0.03bc    |
| Nerolidol 2 <sup>a</sup>                         | 6.28 ±0.20d    | 11.07 ±0.92c  | 12.94 ±0.61c   | 17.41 ±1.22b   | 21.59 ±1.17a   | 14.59 ±2.26c    |
| 2-Penten-1-ol <sup>a</sup>                       | 14.34 ±2.65b   | 24.47 ±1.51a  | 21.68 ±4.51ab  | 25.33 ±3.17a   | 25.73 ±0.81a   | 25.70 ±1.18a    |
| Benzeneacetaldehyde <sup>b</sup>                 | 0.04 ±0.01b    | 0.04 ±0.01b   | 0.08 ±0.01a    | 0.08 ±0.01a    | 0.07 ±0.01a    | 0.07 ±0.01a     |

|                                                  |                |                |                 |                |               |               |
|--------------------------------------------------|----------------|----------------|-----------------|----------------|---------------|---------------|
| Indole <sup>a</sup>                              | 0.00 ±0.00a    | 19.73 ±1.14a   | 27.37 ±0.68a    | 30.06 ±1.38a   | 28.88 ±1.22a  | 22.04 ±2.85a  |
| <b>240 min</b>                                   |                |                |                 |                |               |               |
| Benzyl alcohol <sup>a</sup>                      | 142.87 ±2.97a  | 136.83 ±4.62ab | 126.20 ±7.78bc  | 119.64 ±2.96c  | 122.68 ±7.10c | 137.28 ±8.92a |
| Terpineol, alpha- <sup>b</sup>                   | 0.10 ±0.02a    | 0.06 ±0.01b    | 0.06 ±0.01b     | 0.05 ±0.01b    | 0.05 ±0.00b   | 0.06 ±0.00b   |
| Benzaldehyde <sup>a</sup>                        | 10.69 ±2.05a   | 8.24 ±0.87ab   | 8.22 ±0.79ab    | 6.99 ±0.73b    | 7.37 ±0.47b   | 8.72 ±1.37ab  |
| 3-Hexen-1-ol acetate <sup>a</sup>                | 20.50 ±1.08a   | 1.08 ±1.01c    | 2.16 ±1.03bc    | 2.83 ±0.23b    | 3.24 ±0.81b   | 0.84 ±1.19c   |
| Phenylethyl alcohol <sup>a</sup>                 | 19.55 ±0.83ab  | 19.86 ±1.46a   | 17.90 ±0.71bc   | 16.41 ±0.56c   | 14.39 ±0.87d  | 20.33 ±0.62a  |
| Geraniol <sup>a</sup>                            | 130.59 ±3.55ab | 138.47 ±18.77a | 121.68 ±3.73abc | 108.99 ±3.87bc | 100.37 ±0.98c | 139.67 ±4.75a |
| Nerol <sup>b</sup>                               | 0.05 ±0.00ab   | 0.05 ±0.01a    | 0.04 ±0.00ab    | 0.05 ±0.00ab   | 0.04 ±0.00b   | 0.05 ±0.00ab  |
| Nonanal <sup>b</sup>                             | 0.08 ±0.01ab   | 0.10 ±0.01ab   | 0.08 ±0.01b     | 0.07 ±0.00b    | 0.07 ±0.01b   | 0.11 ±0.03a   |
| 1-Nonanol <sup>b</sup>                           | 0.05 ±0.01ab   | 0.06 ±0.00ab   | 0.06 ±0.01ab    | 0.05 ±0.00b    | 0.05 ±0.00b   | 0.06 ±0.01a   |
| 3-Hexen-1-ol <sup>a</sup>                        | 98.30 ±2.30b   | 89.50 ±4.09b   | 97.17 ±4.70b    | 100.66 ±7.40ab | 99.94 ±6.00b  | 110.14 ±4.66a |
| Methyl salicylate <sup>a</sup>                   | 52.71 ±6.48ab  | 45.42 ±0.43b   | 50.96 ±1.73ab   | 51.59 ±2.62ab  | 53.18 ±1.27ab | 59.02 ±2.49a  |
| Linalool <sup>a</sup>                            | 76.16 ±2.75c   | 87.30 ±2.25b   | 106.48 ±3.28a   | 108.76 ±5.76a  | 119.76 ±3.52a | 112.53 ±4.93a |
| Linalool oxide <sup>a</sup>                      | 75.42 ±2.01b   | 70.35 ±2.55b   | 85.84 ±5.82a    | 86.12 ±3.90a   | 91.34 ±5.53a  | 91.43 ±2.70a  |
| 2,6-dimethyl-2,7-octadiene-1,6-diol <sup>b</sup> | 0.11 ±0.01a    | 0.11 ±0.03a    | 0.15 ±0.01a     | 0.14 ±0.01a    | 0.16 ±0.00a   | 0.16 ±0.05a   |
| Linalool pyran oxide <sup>b</sup>                | 0.41 ±0.02b    | 0.44 ±0.03ab   | 0.46 ±0.02ab    | 0.45 ±0.01ab   | 0.44 ±0.01b   | 0.51 ±0.03a   |
| 2-Hexenal <sup>b</sup>                           | 0.50 ±0.03c    | 0.59 ±0.07b    | 0.56 ±0.03bc    | 0.57 ±0.04bc   | 0.54 ±0.02bc  | 0.70 ±0.07a   |
| Nerolidol 2 <sup>a</sup>                         | 6.28 ±0.20c    | 18.43 ±0.93ab  | 18.06 ±0.83ab   | 15.64 ±0.33b   | 17.47 ±2.38ab | 22.49 ±3.07a  |
| 2-Penten-1-ol <sup>a</sup>                       | 14.34 ±2.65d   | 28.59 ±1.74c   | 33.02 ±1.68bc   | 33.52 ±2.48abc | 36.97 ±0.11ab | 38.86 ±4.69a  |
| Benzeneacetaldehyde <sup>b</sup>                 | 0.04 ±0.01c    | 0.10 ±0.01a    | 0.09 ±0.01ab    | 0.06 ±0.01bc   | 0.11 ±0.03ab  | 0.10 ±0.02a   |
| Indole <sup>a</sup>                              | 0.00 ±0.00a    | 107.09 ±14.77a | 108.57 ±2.41a   | 92.02 ±5.16a   | 96.32 ±3.14a  | 96.34 ±2.38a  |

<sup>a</sup>, nmol/g; <sup>b</sup>, peak area ratio of analyte to internal standard per g. The data are expressed as mean ± S.D. Different means with different letters in the same row are significantly different from each other ( $p \leq 0.05$ ).

**Table S4** Comparison of metabolites (nmol/g) in 0 min and 240 min treatments of dark, UVA, blue light, red light, and near-infrared (NIR) on postharvest tea leaves

|                      | 0 min             | Dark-240 min       | UVA-240 min        | Blue-240 min       | Red-240 min       | Near-infrared (NIR)-240 min |
|----------------------|-------------------|--------------------|--------------------|--------------------|-------------------|-----------------------------|
| Gly                  | 99.90 ±5.78a      | 88.20 ±1.11b       | 100.26 ±4.95a      | 96.83 ±2.91ab      | 96.82 ±2.67ab     | 96.30 ±3.01ab               |
| Ornithine            | 3.42 ±0.11ab      | 2.32 ±0.16c        | 4.18 ±0.42a        | 2.85 ±0.11bc       | 3.40 ±0.56ab      | 2.26 ±0.22c                 |
| γ-Aminobutyric acid  | 438.25 ±24.24b    | 342.32 ±18.82c     | 453.08 ±31.97b     | 580.99 ±28.94a     | 450.00 ±20.86b    | 371.38 ±29.42c              |
| Ser                  | 2535.56 ±87.01ab  | 2365.43 ±41.72b    | 2534.34 ±95.19ab   | 2720.75 ±113.64a   | 2551.60 ±23.51ab  | 2408.53 ±42.51b             |
| Ala                  | 1039.04 ±43.83ab  | 962.29 ±49.52b     | 974.35 ±25.80b     | 1098.84 ±29.69a    | 975.35 ±18.33b    | 964.72 ±36.30b              |
| Citrulline           | 47.76 ±1.80b      | 47.83 ±5.30b       | 46.20 ±0.73b       | 64.75 ±2.43a       | 44.47 ±2.70b      | 46.22 ±5.15b                |
| Asp                  | 3401.65 ±140.54c  | 4676.28 ±117.44a   | 4350.30 ±214.52ab  | 4222.21 ±145.44b   | 3742.34 ±99.33c   | 4529.79 ±81.95ab            |
| Anthranilic acid     | 0.27 ±0.33b       | 1.17 ±0.17a        | 0.30 ±0.37b        | 0.66 ±0.41ab       | 0.27 ±0.33b       | 0.91 ±0.03ab                |
| Tyramine             | 1.80 ±1.15a       | 1.84 ±0.20a        | 2.00 ±0.22a        | 1.81 ±0.19a        | 1.37 ±0.19a       | 2.07 ±0.20a                 |
| Gln                  | 12759.28 ±626.89a | 13502.28 ±1425.89a | 11259.01 ±1126.09a | 10784.94 ±1043.29a | 10978.79 ±907.32a | 12125.54 ±1273.26a          |
| Arg                  | 4261.36 ±36.54bc  | 4948.64 ±374.40b   | 4953.73 ±254.62b   | 5773.23 ±200.76a   | 3934.72 ±147.23c  | 4570.85 ±432.65bc           |
| Hydroxyproline       | 62.00 ±0.98c      | 69.68 ±2.62c       | 81.26 ±2.02ab      | 94.37 ±14.37a      | 83.43 ±0.50ab     | 86.57 ±8.60ab               |
| Glu                  | 5446.66 ±126.60b  | 5993.67 ±137.81ab  | 5927.44 ±313.79ab  | 6184.45 ±209.26a   | 5934.57 ±167.05ab | 5991.33 ±193.90ab           |
| Met                  | 3.56 ±0.52b       | 6.55 ±0.16a        | 5.92 ±0.36a        | 6.82 ±0.74a        | 5.95 ±0.26a       | 6.36 ±0.76a                 |
| His                  | 126.17 ±6.61c     | 195.65 ±17.11ab    | 192.21 ±3.02ab     | 215.59 ±8.40a      | 172.19 ±9.07b     | 180.92 ±17.69b              |
| Thr                  | 540.97 ±5.44b     | 722.27 ±28.74a     | 746.69 ±23.07a     | 753.34 ±5.65a      | 735.04 ±38.56a    | 703.74 ±42.60a              |
| S-Adenosylmethionine | 16.10 ±0.71c      | 26.63 ±1.47b       | 29.72 ±0.83a       | 29.75 ±0.32a       | 26.61 ±1.19b      | 25.67 ±0.62b                |
| Asn                  | 221.83 ±12.46c    | 376.11 ±27.57b     | 471.33 ±18.65a     | 477.93 ±7.59a      | 392.22 ±19.10b    | 406.69 ±58.26ab             |
| Trp                  | 162.91 ±6.62c     | 375.32 ±13.92b     | 409.94 ±17.23ab    | 435.61 ±14.08a     | 431.82 ±10.13a    | 404.00 ±27.50ab             |

|                             |                  |                  |                 |                  |                  |                   |
|-----------------------------|------------------|------------------|-----------------|------------------|------------------|-------------------|
| β-Ala                       | 44.09 ±1.20c     | 146.72 ±3.67a    | 146.74 ±10.54a  | 145.18 ±1.16ab   | 128.49 ±3.88b    | 142.44 ±10.82ab   |
| Lys                         | 96.02 ±0.67c     | 270.04 ±10.14b   | 331.12 ±19.14a  | 336.09 ±13.84a   | 276.33 ±7.34b    | 266.04 ±19.39b    |
| Phe                         | 42.03 ±1.57c     | 162.61 ±2.52b    | 206.90 ±9.96a   | 216.80 ±22.70a   | 205.88 ±5.50a    | 169.69 ±11.71b    |
| Pro                         | 115.21 ±2.68c    | 253.02 ±10.09b   | 329.40 ±39.25a  | 357.78 ±24.52a   | 300.08 ±3.95ab   | 303.36 ±44.51ab   |
| Val                         | 87.96 ±2.92c     | 280.92 ±9.98b    | 376.95 ±36.29a  | 386.33 ±18.50a   | 338.78 ±8.43ab   | 324.68 ±38.09ab   |
| Ile                         | 36.24 ±0.89c     | 165.32 ±8.30b    | 222.64 ±29.29a  | 231.97 ±13.65a   | 205.06 ±11.94ab  | 197.05 ±26.25ab   |
| Leu                         | 35.82 ±1.07c     | 263.99 ±15.90b   | 351.87 ±36.43a  | 361.21 ±23.03a   | 306.09 ±16.80ab  | 303.22 ±39.53ab   |
| Tyr                         | 38.51 ±1.12d     | 382.41 ±26.63c   | 496.55 ±37.44ab | 581.46 ±33.29a   | 482.65 ±32.79b   | 437.13 ±52.42bc   |
| <hr/>                       |                  |                  |                 |                  |                  |                   |
| Uridine                     | 10.40 ±1.26ab    | 13.81 ±0.87a     | 10.89 ±0.91ab   | 11.52 ±1.77ab    | 12.17 ±0.90ab    | 9.87 ±1.05b       |
| Cytosine                    | 1.00 ±0.00       | 1.13 ±0.16       | 1.26 ±0.00      | 1.21 ±0.00       | 1.15 ±0.00       | 0.89 ±0.07        |
| Inosine                     | 2.62 ±0.37a      | 2.12 ±0.22ab     | 1.78 ±0.15ab    | 1.94 ±0.25ab     | 1.51 ±0.55b      | 1.40 ±0.34b       |
| Glutathione (GSH)           | 3.93 ±0.13a      | 3.50 ±0.17a      | 3.50 ±0.18a     | 3.38 ±0.19a      | 2.60 ±0.28b      | 3.39 ±0.32a       |
| Adenosine                   | 5.68 ±0.45c      | 5.56 ±0.12c      | 7.50 ±0.75b     | 7.61 ±0.26b      | 9.23 ±0.31a      | 6.36 ±0.22c       |
| Guanosine                   | 11.48 ±1.08c     | 17.75 ±0.15b     | 19.09 ±0.96ab   | 18.98 ±0.96ab    | 20.35 ±0.31a     | 18.99 ±0.66ab     |
| Glutathione (GSSG)_divalent | 84.67 ±3.55b     | 124.80 ±15.57a   | 138.57 ±14.07a  | 141.74 ±1.82a    | 137.43 ±16.74a   | 133.05 ±16.68a    |
| Cytidine                    | 4.04 ±0.08c      | 11.93 ±0.32b     | 12.17 ±0.30b    | 11.77 ±0.44b     | 13.69 ±0.37a     | 11.39 ±0.57b      |
| <hr/>                       |                  |                  |                 |                  |                  |                   |
| 3-Phosphoglyceric acid      | 90.01 ±1.72a     | 81.05 ±3.10b     | 81.87 ±3.85b    | 92.55 ±3.81a     | 80.67 ±2.17b     | 82.54 ±0.16b      |
| Malic acid                  | 3206.21 ±120.50a | 2195.19 ±89.19bc | 2115.48 ±42.99c | 2443.27 ±101.75c | 2791.38 ±120.72b | 2289.80 ±110.84bc |
| Fumaric acid                | 138.97 ±8.80a    | 136.02 ±7.23a    | 129.02 ±1.59a   | 134.46 ±2.99a    | 120.98 ±11.38a   | 137.38 ±10.55a    |
| 2-Oxoisovaleric acid        | 1.46 ±0.20a      | 0.29 ±0.35bc     | 0.98 ±0.60ab    | 0.00 ±0.00c      | 0.29 ±0.36bc     | 0.00 ±0.00c       |
| Citric acid                 | 2360.98 ±74.40a  | 2452.78 ±62.55a  | 2265.59 ±68.59a | 2345.01 ±56.02a  | 2346.39 ±182.21a | 2221.47 ±88.44a   |
| Isocitric acid              | 133.89 ±7.57ab   | 139.58 ±3.58a    | 133.92 ±6.64ab  | 140.55 ±8.43a    | 142.03 ±7.30a    | 119.04 ±5.35b     |

|                            |                   |                    |                    |                    |                   |                    |
|----------------------------|-------------------|--------------------|--------------------|--------------------|-------------------|--------------------|
| Salicylic acid             | 66.71 ±4.58abc    | 65.28 ±2.18bc      | 61.54 ±1.10c       | 68.56 ±1.93ab      | 72.86 ±1.91a      | 71.29 ±0.37ab      |
| Phenylpyruvic acid         | 3.51 ±0.48a       | 3.47 ±0.10a        | 3.29 ±0.16a        | 3.36 ±0.12a        | 3.92 ±0.08a       | 3.87 ±0.49a        |
| Glycolic acid              | 37.94 ±46.47b     | 0.00 ±0.00b        | 56.11 ±68.73b      | 240.05 ±18.79a     | 0.00 ±0.00b       | 0.00 ±0.00b        |
| Lactic acid                | 170.39 ±10.59a    | 96.91 ±10.54a      | 213.61 ±88.37a     | 127.54 ±10.62a     | 342.86 ±241.21a   | 112.70 ±6.32a      |
| Phosphoenolpyruvic acid    | 8.04 ±0.53b       | 8.27 ±0.08b        | 9.62 ±2.39ab       | 12.71 ±1.16a       | 11.88 ±0.60a      | 11.11 ±0.62ab      |
| cis-Aconitic acid          | 49.40 ±4.22c      | 47.93 ±0.59c       | 52.77 ±2.38c       | 68.26 ±3.70a       | 64.83 ±6.36ab     | 56.87 ±2.23bc      |
| Benzoic acid               | 3.27 ±0.32b       | 3.54 ±0.07b        | 3.48 ±0.20b        | 3.69 ±0.07ab       | 4.09 ±0.23a       | 3.53 ±0.11b        |
| Quinic acid                | 15317.35 ±868.21a | 15998.29 ±1534.98a | 15624.38 ±1454.36a | 16164.08 ±1781.93a | 18436.31 ±652.13a | 15815.53 ±2605.23a |
| Succinic acid              | 688.88 ±24.81b    | 714.88 ±8.16ab     | 698.89 ±35.34b     | 748.31 ±26.92ab    | 795.80 ±55.88a    | 684.12 ±18.83b     |
| Gluconic acid              | 317.51 ±12.21c    | 359.69 ±16.38b     | 355.53 ±13.01b     | 409.21 ±5.02a      | 406.16 ±18.93a    | 361.79 ±17.85b     |
| Shikimic acid              | 461.14 ±18.90c    | 533.91 ±9.54ab     | 517.98 ±2.11ab     | 497.18 ±12.01bc    | 536.13 ±21.69ab   | 546.10 ±26.77a     |
| Chorismic acid             | 6.59 ±4.07a       | 10.23 ±0.50a       | 10.78 ±0.65a       | 7.40 ±4.57a        | 8.25 ±5.06a       | 12.51 ±0.42a       |
| <hr/>                      |                   |                    |                    |                    |                   |                    |
| 3-Phosphoglyceric acid     | 90.01 ±1.72a      | 81.05 ±3.10b       | 81.87 ±3.85b       | 92.55 ±3.81a       | 80.67 ±2.17b      | 82.54 ±0.16b       |
| Fructose 6-phosphate       | 68.96 ±1.42a      | 54.52 ±2.87bc      | 47.95 ±1.89c       | 52.13 ±1.94c       | 61.64 ±6.10ab     | 54.95 ±2.52bc      |
| Fructose 1,6-diphosphate   | 21.85 ±0.68a      | 15.55 ±0.82b       | 15.26 ±1.32b       | 16.58 ±0.53b       | 16.72 ±0.14b      | 15.59 ±0.55b       |
| 6-Phosphogluconic acid     | 9.95 ±0.62a       | 5.66 ±0.42c        | 7.72 ±1.00b        | 8.08 ±0.20b        | 8.35 ±0.42ab      | 7.82 ±0.21b        |
| Pyruvic acid               | 26.02 ±3.32a      | 18.23 ±0.31b       | 20.60 ±0.97b       | 17.68 ±0.10b       | 21.58 ±2.81ab     | 21.75 ±0.84ab      |
| Glucose 6-phosphate        | 402.83 ±13.00b    | 418.33 ±5.27ab     | 390.19 ±8.16b      | 419.30 ±34.11ab    | 451.33 ±14.20a    | 378.83 ±10.38b     |
| Glucose 1-phosphate        | 27.64 ±1.47ab     | 25.48 ±1.39b       | 25.39 ±0.14b       | 25.91 ±0.95b       | 30.18 ±1.96a      | 24.30 ±0.62b       |
| Dihydroxyacetone phosphate | 12.28 ±0.09ab     | 9.84 ±0.35c        | 10.57 ±1.02bc      | 13.84 ±1.40a       | 13.69 ±0.58a      | 12.02 ±0.91abc     |
| Ribose 5-phosphate         | 2.40 ±0.17b       | 1.84 ±0.15c        | 2.59 ±0.20ab       | 2.82 ±0.11ab       | 2.97 ±0.10a       | 2.60 ±0.31ab       |
| Ribulose 5-phosphate       | 11.48 ±1.25ab     | 9.71 ±0.41b        | 11.26 ±1.44ab      | 13.67 ±0.63a       | 13.09 ±1.54a      | 12.75 ±0.83a       |



|                           |                |                |                |               |                |                |
|---------------------------|----------------|----------------|----------------|---------------|----------------|----------------|
| Glycerol-3-phosphate      | 64.08 ±5.24b   | 80.59 ±4.23ab  | 88.16 ±11.12a  | 95.82 ±6.60a  | 88.97 ±1.76a   | 87.44 ±11.56a  |
| Sedoheptulose 7-phosphate | 22.28 ±1.10d   | 28.59 ±3.17c   | 39.38 ±3.00ab  | 37.88 ±2.67ab | 42.03 ±1.16a   | 33.92 ±2.29bc  |
| Gluconic acid             | 317.51 ±12.21c | 359.69 ±16.38b | 355.53 ±13.01b | 409.21 ±5.02a | 406.16 ±18.93a | 361.79 ±17.85b |
| Phosphoenolpyruvic acid   | 8.04 ±0.53b    | 8.27 ±0.08b    | 9.62 ±2.39ab   | 12.71 ±1.16a  | 11.88 ±0.60a   | 11.11 ±0.62ab  |

---

The data are expressed as mean ± S.D. Different means with different letters in the same row are significantly different from each other ( $p \leq 0.05$ ).

**Table S5** Full name of the metabolites in tea leaves.

| Abbreviation | Full name           |
|--------------|---------------------|
| Gly          | Glycine             |
| Ser          | Serine              |
| Ala          | Alanine             |
| Asp          | Aspartic acid       |
| Arg          | Arginine            |
| Glu          | Glutamic acid       |
| His          | Histidine           |
| Thr          | Threonine           |
| Asn          | Asparagine          |
| Trp          | Tryptophan          |
| $\beta$ -Ala | $\beta$ -Tryptophan |
| Lys          | Lysine              |
| Phe          | Phenylalanine       |
| Pro          | Proline             |
| Val          | Valine              |
| Ile          | Isoleucine          |
| Leu          | leucine             |
| Tyr          | Tyrosine            |

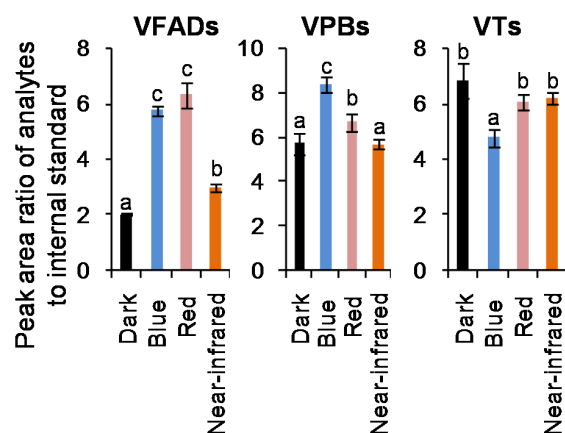

**Figure S1** Effects of LED and dark on volatiles of preharvest tea leaves after treatment from the 1<sup>st</sup> leaf stage to the 4<sup>th</sup> leaf stage

VFADs, volatile fatty acid derivatives; VPBs, volatile phenylpropanoids/ benzenoids; VTs, volatile terpenes. Different means with different letters are significantly different from each other ( $p \leq 0.05$ ).

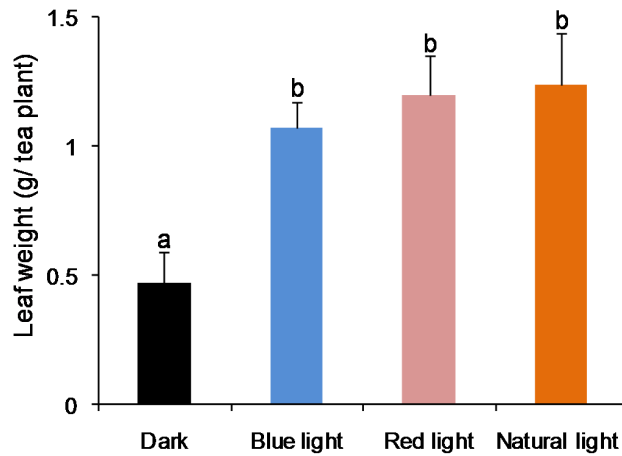

**Figure S2** Effects of LED, dark, and natural light on biomass of preharvest tea leaves after treatment from the 1<sup>st</sup> leaf stage to the 4<sup>th</sup> leaf stage

Tea seedlings at the 1<sup>st</sup> leaf stage were treated with blue light, red light, and dark, respectively. After 14 days-treatments, the tea plants developed from the 1<sup>st</sup> leaf stage to 4<sup>th</sup> leaf stage, and the weights of growing four leaves from each treatment were analyzed. In contrast to natural light treatment as a control, blue and red lights treatments had no significant effects on the biomass of tea leaves, whereas dark treatment significantly reduced the biomass of tea leaves. Different means with different letters are significantly different from each other ( $p \leq 0.05$ ).

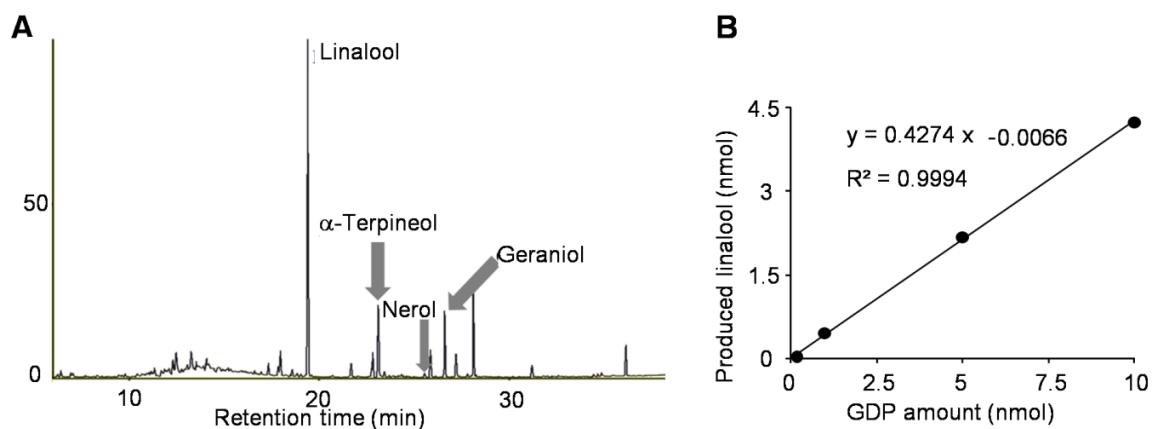

**Figure S3** GC-MS chromatogram of products from acidic hydrolysis of GDP (A) and linear relationships between GDP amount and its acidic hydrolyzed product linalool content (B).

GDP, geranyl diphosphate. (A) Fifty nmol of GDP was used for acidic hydrolysis reaction.

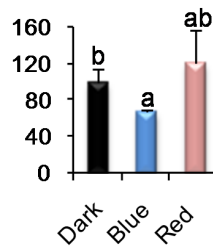

**Figure S4** Effects of blue light and red light on the content of linoleic acid in preharvest tea leaves.

All treatments on preharvest tea leaves were carried out for 3 days. The y-axis unit is relative content (%) of metabolites, which was calculated based on the dark treatment (100%) as a control. Different means with different letters are significantly different from each other ( $p \leq 0.05$ ).

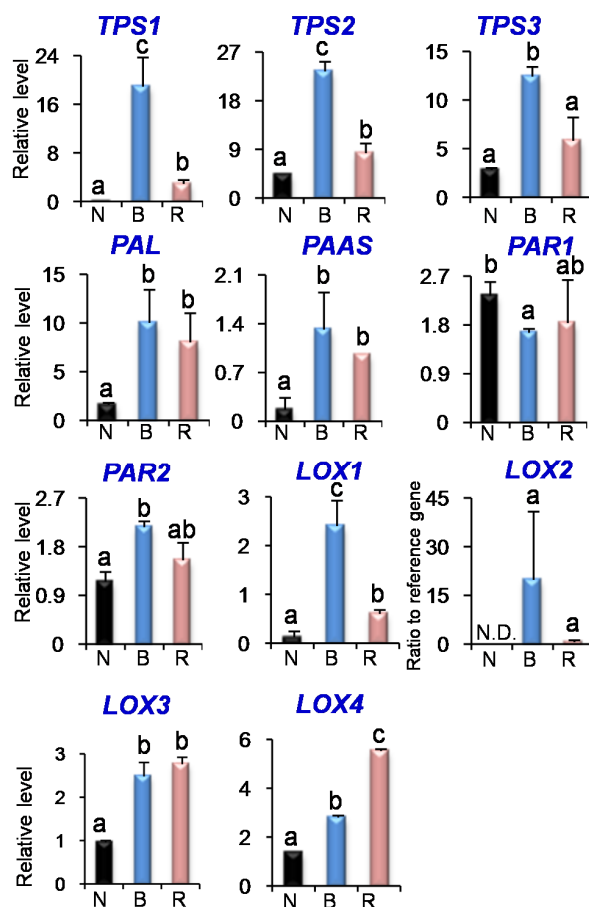

**Figure S5** Effects of blue light and red light on the expression levels of key genes involved in formation of volatiles in preharvest tea leaves

N, natural light treatment. B, blue light treatment. R, red light treatment. N.D., not detected. *TPS*, terpene synthase. *PAL*, phenylalanine ammonialyase. *PAAS*, phenylacetaldehyde synthase. *PAR*, phenylacetaldehyde reductases. *LOX*, 9/13-lipoxygenase. All treatments on preharvest tea leaves were carried out for 3 days. The relative expression levels of genes were calculated based on the dark treatment (1) as a control. Different means with different letters are significantly different from each other ( $p \leq 0.05$ ).

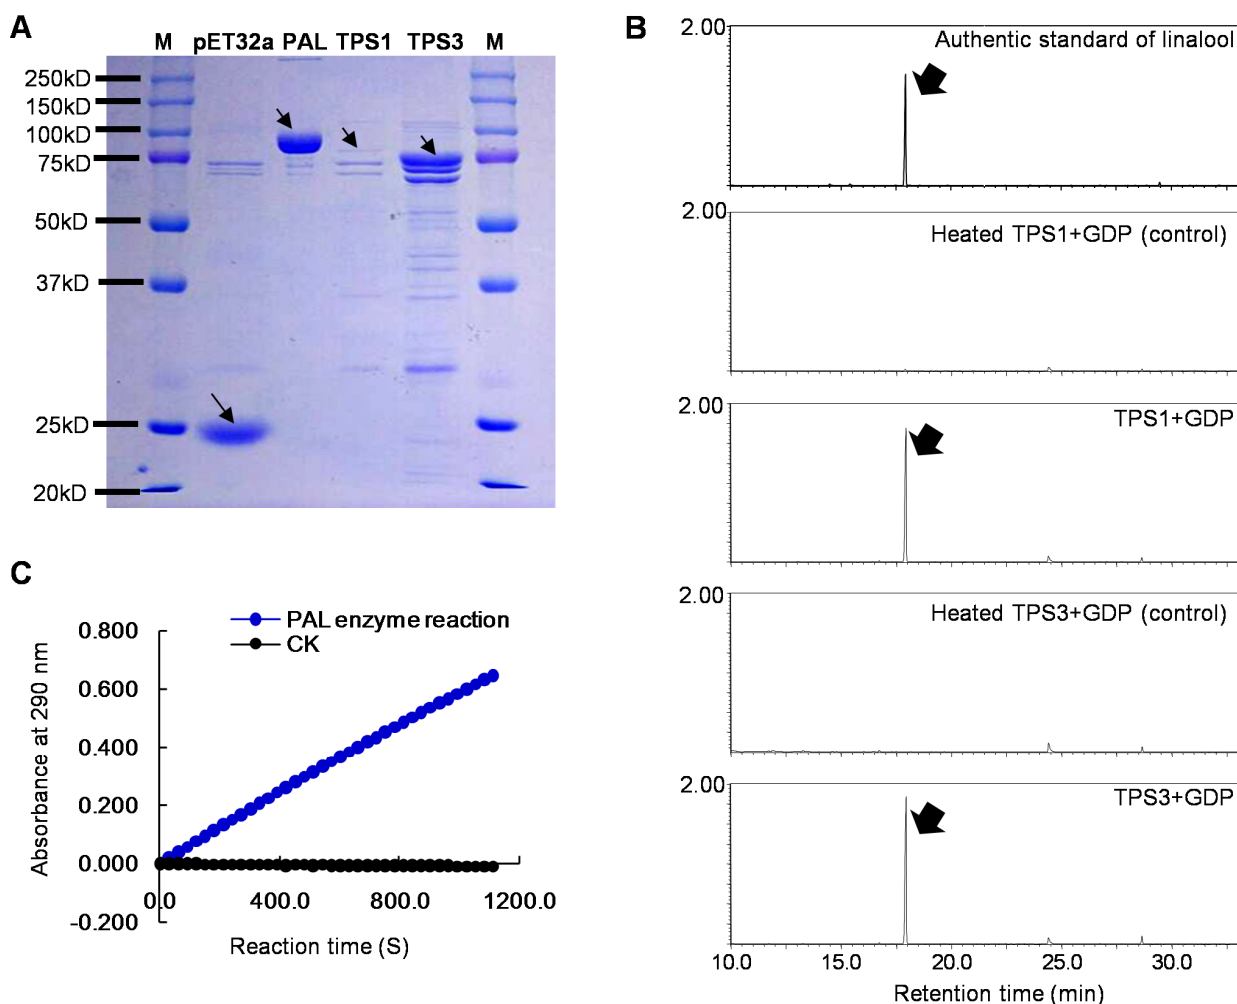

**Figure S6** SDS-page identification (A) and functional identifications (B and C) of TPS1, TPS3, and PAL recombinant proteins produced in *Escherichia coli*.

TPS, terpene synthase; PAL, phenylalanine ammonia-lyase; GDP, geranyl diphosphate. (A) Denatured 6×His-PAL, TPS1, and TPS3 recombinant proteins were separated on a 10% acrylamide SDS-PAGE gel. The marker lane shows the denatured protein molecular weight markers with the size label on the left. The proteins were indicated by the arrows. (B) The GC-MS chromatograms indicate that *TPS1* and *TPS3* recombinant protein produced in *E.coli* exhibited the activity of transformation from GDP to linalool. (C) The reaction product *trans*-cinnamic acid (CA) was determined at 290 nm. The PAL was assayed from the increase in absorbance at 290 nm, suggesting that the PAL recombinant protein produced in *E. coli* exhibited the activity of transformation from L-Phe to CA.



```

PhPAAS      CAGATCATTGAAGTTGTGGCTTGTGTTAAAAAGTTATGGTGTAGCTAACCTCAGAAATTT
CsPAAS      -----GGGGGAACCTTCAATCTTA
RhPAAS      TCGGGCATTGAAGCTGTGGCTTGTGCTAAGAAGCTATGGTGTGGCTAACCTTAGAAACTT
                *  * * * * *  *  *

PhPAAS      CATAAGAAGCCATATAGAAATGGCTAAGCATTTTGAAGAACTTGTAGCCATGGATGAGAG
CsPAAS      CATAAGAAACCATATTGAATTGGCTAAACACTTTGAAGAGCTTGTCTCAAGACCCGAG
RhPAAS      TATTCGTATCCATGTCAAATGGCCAAGACTTTTGAAGGGCTTGTGAGAATGGACAAGAG
                **  *  *  * * * * *  *  * * * * *  * * * * *  * *  * *

PhPAAS      GTTCGAAATTATGGCCCCAAGAAATTTCTCTCTGGTGTGCTTTAGGGTTTCACTATTGGC
CsPAAS      ATTCAGGTTGTTGCTCCTCGGAAGTTTTCATTGGTTTGTCTTTCCTTCT-----
RhPAAS      GTTTGAGATTCTGGTGCCTAGAAACTTCTCCTTGGTCTGCTTTAGAATTTACCATCGGC
                **  *  * * * *  *  * * * * *  *  * * * * *  * * * *

PhPAAS      ATTGGAGAAAAAGTTTAACTTTGTCGATGAAACCCAAGTGAATGAGTTCAACGCTAAGCT
CsPAAS      -----GCCTCCCATAAACGAAGACTGTGCTAACAACTAAACCATGACCT
RhPAAS      CTTGATCAGTAGTAATGAGGATGATGAGATCGGTATGGTAAACGAGGTCAATTGCAAATT
                *      *      *      *  * *  *  *  * *  *  *  *

PhPAAS      TTTAGAGTCCATTATTTTCATCCGGTAATGTTTACATGACTCATACTGTGGTTGAAGGAGT
CsPAAS      ACTGGATGCTGTTAACTCAACCGGAAATTATTCATTTCTCATACTGTTCTATCAGGTAA
RhPAAS      GCTGGAGGCCATCAATGCATCAGGTAAAGCATACATGACTCATGCTGTGGTTGGAGGGCT
                *  * *  *  *  *  * *  * * * *  *  * * *  *  * *  *  * * *

PhPAAS      TTACATGATACGTTTTGCTGTTGGTGCACCTCTCACTGACTATCCCCATATTGATATGGC
CsPAAS      GTACACATTACGTTTGCAGTAGGACTCCATTGACAGAAGAAAGGCATGAAATGCAGA
RhPAAS      GTACGTGCTTCGTTGCGCGTTGGTGCAACTCTGACCGAGGAAAAGCACATAGTCGAGGC
                ***  *  * *  *  * * * * * *  *  * * * * *  *  * *  *

```

**Figure S7** Alignment of *Camellia sinensis* PAAS (*CsPAAS*) with *Petunia x hybrida* PAAS (*PhPAAS*, DQ243784) and rose hybrid PAAS (*RhPAAS*, DQ192639).

cDNA sequences were aligned using Clustal X. Method: tea plant shoot stems cDNA library from NCBI was chosen to blast, one PAAS (phenylacetaldehyde synthase) unigenes (*CsPAAS*, FS952786) was obtained by blasting with the homologous sequences from *PhPAAS* and *RhPAAS*. *Petunia x hybrida* PAAS and rose hybrid PAAS from paper: Kaminaga, Y., et al., *Plant phenylacetaldehyde synthase is a bifunctional homotetrameric enzyme that catalyzes phenylalanine decarboxylation and oxidation*. *Journal of Biological Chemistry*, 2006, 281, 23357-23366.

CsPAR1 AAAAGAGTGGTTTTGACATCGTCTGTAGCTGCAGTTGCATACAATGGTAGGCCTCGAACT  
CsPAR2 AAAAGAGTAGTGTGACATCTTCTGTAGCTGCCGTTGCTTTCAATGGTAGGCCTCGAGCT  
RdPAR AAACGGGTGGTCTTAACATCTTCTATAGCCGAGTTGCATATAATGGAAAGCCTCGAACT  
SI PAR1 AAACGAGTTGTTTTAACGTCTTCCATAGCTGCAGTTGCTTACAGTGGTCAGCCTCGGACA  
SI PAR2 AGAAGAGTGGTCTTGACATCATCTGTTGCAGCAGTTGCTTTCAATGGCAAGCCAAGAACC

\* \* \* \* \* \* \* \* \* \* \* \* \* \* \* \* \* \* \* \* \* \* \* \* \* \* \* \* \* \* \* \* \* \* \* \*

CsPAR1 TCTGATGTGATAATTGATGAGACTTGGTTTTCTGATCCGGTGTGCATGCAAGGAAAATAAG  
CsPAR2 CCTGACGTCTAGTGTGATGAGAGTTGGTTTTCTGATCCAGAGTTCTGCAAGCAAATAAG  
RdPAR CCTGATGTAGTGGTTGATGAGACTTGGTTACTGATCCAGATGTCTGTAAGGAATCGAAG  
SI PAR1 CCTGAGTTGTGGTTGATGAGAGCTGGTGGACCAGTCCAGACTACTGCAAAGAAAAACAG  
SI PAR2 CCTGAAGTGGTGGTTGATGAAACATGGTGGTCAGATCCTGACTTTTGCAGAGAATCACAG

\* \* \* \* \* \* \* \* \* \* \* \* \* \* \* \* \* \* \* \* \* \* \* \* \* \* \* \* \* \* \* \* \* \* \*

CsPAR1 CTTTGGTATCAGCTGTCCAAGACTCTAGCAGAGGATGCTGCCTGGAAGTTTGCAAAGAG  
CsPAR2 CTTTGGTATGTGCTGTCAAAGACTTTAGCAGAGGATGCTGCCTGGAAGTTTACAAAAGGA  
RdPAR CTATGGTATGTGCTTTCAAAGACTTTGGCCGAGGATGCTGCCTGGAATTTGTAAAGGAG  
SI PAR1 CTCTGGTATGTCTCTCAAAGACATTGGCTGAGGATGCTGCGTGGAAAGTTGTGAAGGAG  
SI PAR2 CTCTGGTATGTGCTTTCCAAGACATTAGCTGAGGATGCTGCGTGGAAAGTTGTGAAGGAG

\* \* \* \* \* \* \* \* \* \* \* \* \* \* \* \* \* \* \* \* \* \* \* \* \* \* \* \* \* \* \* \* \* \* \*

CsPAR1 AACGGTATTGACATGGTTGCAATAAACCCAGCAATGGTTATTGGTCCTCTGTTACAACCA  
CsPAR2 AAGGGTATTGACATGGTTACAATAAACCCAGCAATGGTTGCGGTCCTCTCTTGCAGCCA  
RdPAR AAGGGAATTGACATGGTTACAATAATCCTGCAATGGTGATCGGTCCTCTGTTACAGCCA  
SI PAR1 AAAGGCATTGATATGGTTGTAGTAAACCCTGCTATGGTTATTGGTCCTCTGTTACAGCCT  
SI PAR2 AAAGCTTTGATATGGTTACAATAAACCCAGCAATGGTTATAGGCGGTTTGTGCAACCA

\* \* \* \* \* \* \* \* \* \* \* \* \* \* \* \* \* \* \* \* \* \* \* \* \* \* \* \* \* \* \* \* \* \* \*

CsPAR1 ARACTTAATACAAGTTCTGCTGCTATCTTGAACCTTAATAAATGGTTCACAAACATATCCA  
CsPAR2 ACTCTCAATACAAGTGTCTGCTGCAATTTTGAACGTAATAAATGGTTCACAAACATTTCCA  
RdPAR ACGTAAATACAAGTGTCTGCTGCAATTTCTGAATATTATTAGGGAGCTCGAACATATCCA  
SI PAR1 ARACTTAATACCAGTTCTGCTGCTGCTTGTGAAATGGTGTGAGACATATCCA  
SI PAR2 ACGTAAATACAAGTGTCTGCTGCTATCTTACAACCTGCTAAATGGTTCGAAACATATCCA

\* \* \* \* \* \* \* \* \* \* \* \* \* \* \* \* \* \* \* \* \* \* \* \* \* \* \* \* \* \* \* \* \* \* \*

CsPAR1 AATGCTTCATTTGGATGGATTAATGTTAAAGATGTTGCAAATGCGCACATTCAAGCATAT  
CsPAR2 AATTCTACATTTGGATGGGTTAATGTTAAAGATGTTGCCAATGCACATATTCAAGCATT  
RdPAR AATGCAAGTTTTGGATGGATTAATGTCAAAGATGTTGCCAACGCACATGTTCAAGCATT  
SI PAR1 AATTCTCTTTTGGTGGGTTAACGTGAAAGATGTTGCAAATGCACATATTCTTGCATT  
SI PAR2 AATTCTACATTTGGTGGGTTAACGTGAAAGATGTCGCCCTTGCACATATTCTGCGATT

\* \* \* \* \* \* \* \* \* \* \* \* \* \* \* \* \* \* \* \* \* \* \* \* \* \* \* \* \* \* \* \* \* \* \*

CsPAR1 GAGATTCTTCAGCCAATGGAAGATATTGTTTGGTTGAGAGAGTCGCACACTACTCTGAA  
CsPAR2 GAGATTCTTCAGCTAATGGAAGATATTGTTTGGTTGAGAGAGTTGCACACTACTCTGAA  
RdPAR GAGATTCTTCAGCTAGTGAAGATATTGTTTGTAGAGAGAGTTGCACACTTACTGAA  
SI PAR1 GAGAACCCTTCAGCTAATGGGAGATACTTAATGGTTGAGAGGTTGCACACTATTCTGAT  
SI PAR2 GAAAACCCTTCAGCTAATGGTAGATATTTAATGGTGGAGTCAGTTGCACACTACTCTGAG

```

** * ***** * *** ***** * * ** *** ** ***** ****
CsPAR1      GTTGTGAACATACTACACAAGCTTTATCCTTCTTTTCAACTTCCAGAAAAGTCTGCGGAT
CsPAR2      GTTGTGAAGATACTACAAGAGCTGTTTCCTGCTTTTCAACTTCCAGAAAAGTGTGCTGAT
RdPAR       GTTCTGCAAATTATACATGAGCTGTACCCTGATTTGCAACTTCCAGAGAAATGTTCCGGAT
SI PAR1     ATATTGAAGATATTGCGTGACCTTTATCCTACTATGCAACTTCCAGAAAAGTGTGCTGAT
SI PAR2     ATAGTTAAGATATTACGCGAGCTTTACCCTACACTGAAGCTTCCAGAAAAGTGTGCTGAT
* * * * * * * * * * * * * * * * * * * * * * * * * * * * * * * * *

CsPAR1      GACAAACCATTTATGCCAACATACCAGGTATCCAGGGAAAAAGCAAAAACCTTTAGGAATT
CsPAR2      GACAAGCCATTTACGCCGACTTACCAGGTGTCTAAGGAAAGAACAAAAAGCTTAGGTATT
RdPAR       GATAAACCTTTTGTGCCAACATATCAGGTGTCCAAAGAAAAGGCAAAAGAGCTTGGGAATT
SI PAR1     GACAACCCATTGATGCAAATTATCAAGTATCAAAGGAGAAGGCAAAAAGCTTGGGTATT
SI PAR2     GATAAGCCATTTACGCCAACGTACCAGGTTAACGTAGAAAGAGCCAAAAAATTGGGTATT
** * * * * * * * * * * * * * * * * * * * * * * * * * * * * * * * *

CsPAR1      GACTTCATTTCCCTCGAGGAGGGCCTCAAGGAAACTGTTGAAAGCTTGACAGAGAAGAAA
CsPAR2      GAGTTCATTTCCCTCAAGCAGAGCATCAAGGAAACAGTTGAAAGCTTGATGGAGAAGAAA
RdPAR       GAGTTTATTTCCATTAGACATTAGCCTCAAGGAAACAATTGAAAGCTTGAAGGAAAAGAGT
SI PAR1     GAGTTTACTACCTTGAAGAAAGCATCAAAGAAACTGTTGAAAGTTTGAAGGAAAAGAAG
SI PAR2     GAATTCATTTCTTTGGCGGAAAGCGTCAAGGAAACAGCTGAAAGCTTGAAGAGAAGAAG
** * * * * * * * * * * * * * * * * * * * * * * * * * * * * * * * *

CsPAR1      TTTTTTGGTATGTG-----
CsPAR2      CTTTTCACTCGGTGA-----
RdPAR       ATCGTCAGCTTCTGA-----
SI PAR1     TTTTTTGGAGGTTTCATCTTCTATGTAA
SI PAR2     TTTTACTGA-----
*

```

**Figure S8** Alignment of *Camellia sinensis* PARs (*CsPAR1* and *CsPAR2*) with tomato PARs (*SI PAR1*, NM\_001247894; *SI PAR2*, NM\_001247901) and *Rosa damascene* PAR (*RdPAR*, AB426519).

cDNA sequences were aligned using Clustal X. Method: Tea library of GAAC01.1 was downloaded from NCBI, two PAR (*Phenylacetaldehyde reductase*) unigenes (*CsPAR1* and *CsPAR2*) were obtained by blasting with the homologous sequences from *SI PAR1*, *SI PAR2*, and *RdPAR*.

*Rosa damascene* PAR from paper: Chen, X.M., et al., *Functional characterization of rose phenylacetaldehyde reductase (PAR), an enzyme involved in the biosynthesis of the scent compound 2-phenylethanol. Journal of Plant Physiology, 2011, 168, 88-95.*

Tomato PARs from paper: Tieman, D.M., et al., *Tomato phenylacetaldehyde reductases catalyze the last step in the synthesis of the aroma volatile 2-phenylethanol. Phytochemistry, 2007, 68,2660-2669.*

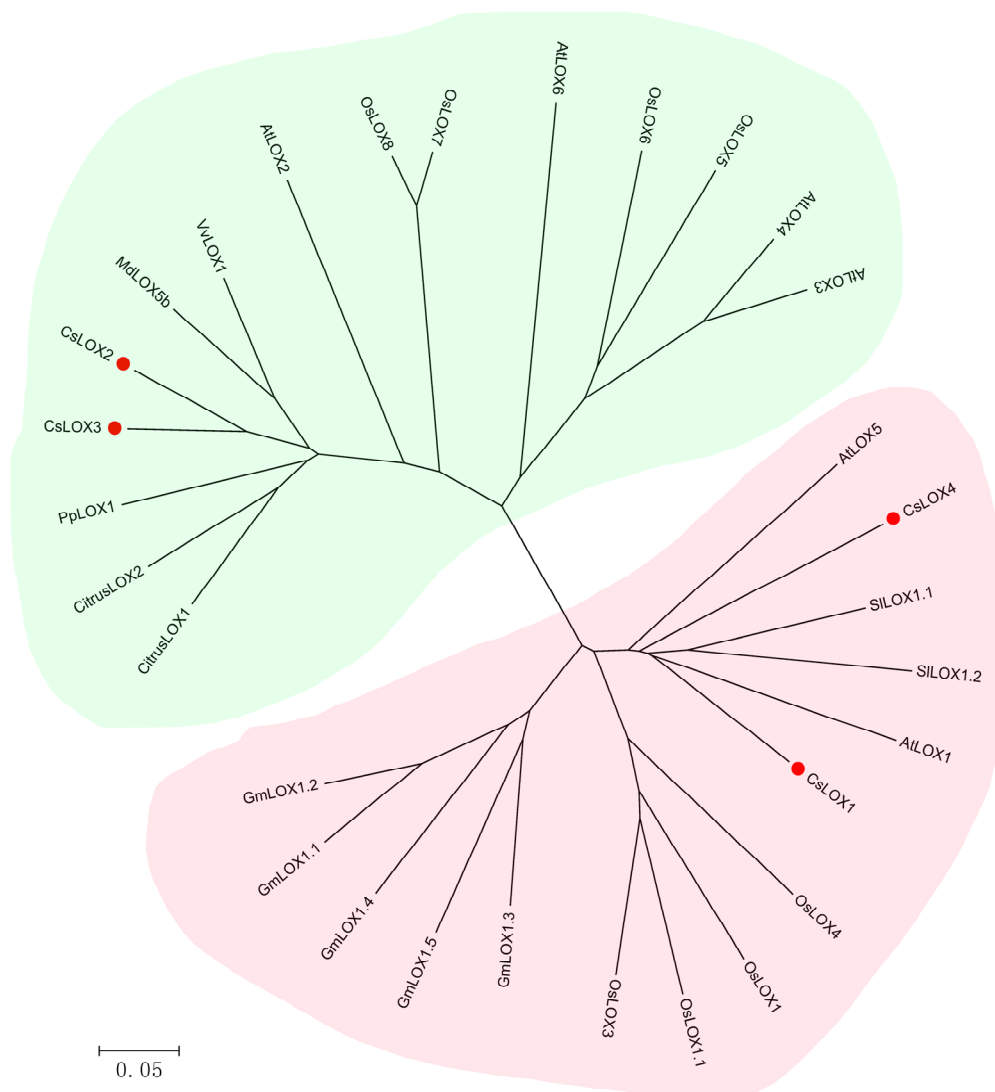

**Figure S9** Phylogenetic analysis of *Camellia sinensis* (CsLOX1 , CsLOX2, CsLOX3 and CsLOX4,) and other plant Lipoxygenase genes. AtLOX1, Q06327; AtLOX2, P38418; AtLOX3, Q9LNR3; AtLOX4, Q9FNX8; AtLOX5, Q9LUW0; AtLOX6, Q9CAG3; CitrusLOX1, V4U565; CitrusLOX2, V4TFS9; GmLOX1.1, P08170; GmLOX1.2, P09439; GmLOX1.3, P09186; GmLOX1.4, P24095; GmLOX1.5, P38417; MdLOX5b, S4UL41; OsLOX1, Q76I22; OsLOX1.1, P29250; OsLOX3, Q7G794; OsLOX4, Q53RB0; OsLOX5, Q7XV13; OsLOX6, Q8H016; OsLOX7, P38419; OsLOX8, Q84YK8; PpLOX1, M5W1M2; SILOX1.1, P38416; SILOX1.2, P38415; VvLOX1, F6HB91.

Method: The phylogenetic tree constructed using MEGA (version 5.0), and the sequence alignment was used for a Neighbor–Joining (NJ) tree using default parameters in MEGA. Bootstrap analysis of the NJ tree was performed using 1000 replicates.

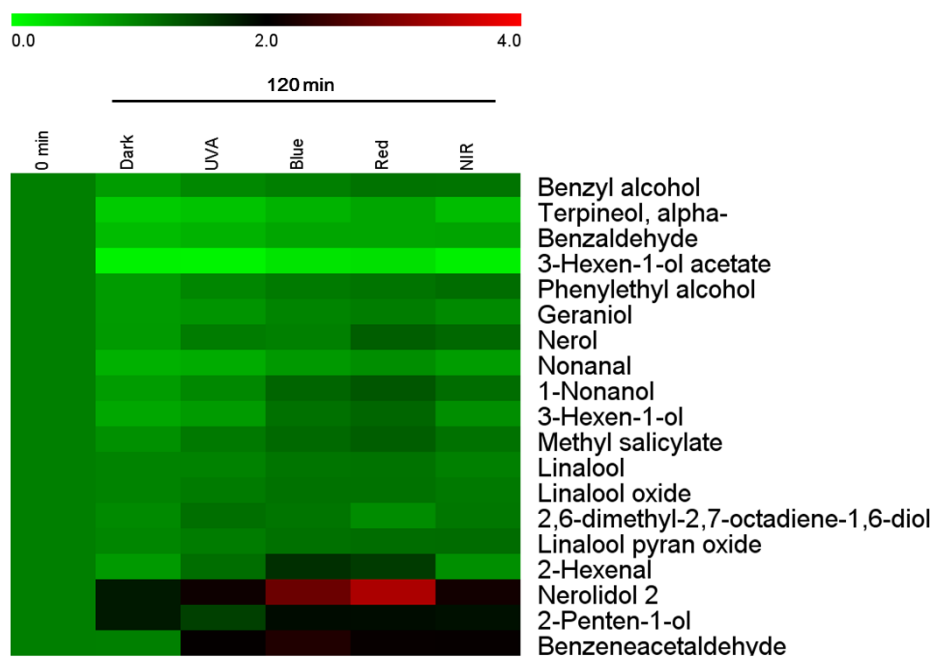

**Figure S10** Comparison of volatiles in 0 min and 120 min treatments of dark, UVA, blue light, red light, and near-infrared (NIR) on postharvest tea leaves

The 0 min treatment was normalized as 1. The data were calculated based on mean values (n=3). The original data for making this figure is shown in Table S3 (Supplementary information).

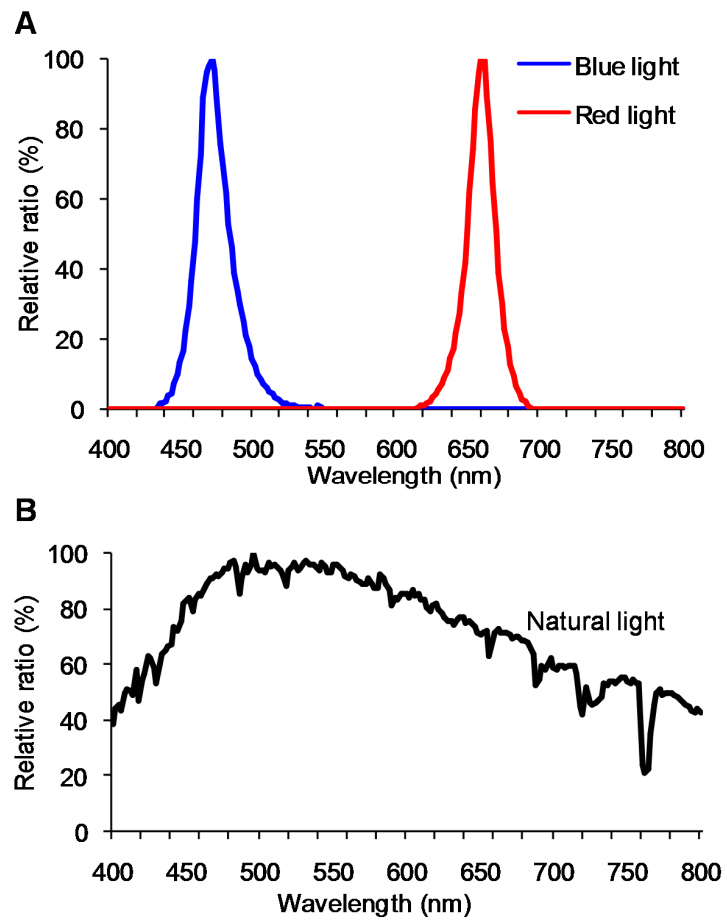

**Figure S11** Light conditions under blue light and red light (A), and natural light (B)

The highest light intensity was defined as 100%.
